# Supplementary material for: FeSi2: a two-dimensional ferromagnet containing planar hexacoordinate Fe atoms
Source: Royal Society of Chemistry journal article supplement (doi:10.1039/d1na00772f), 2021-12-13
Supplement: d1na00772f1.pdf [file d1na00772f1.pdf]

## Supporting Information

### FeSi<sub>2</sub>: a two-dimensional ferromagnet containing planar hexacoordinate Fe atoms

Ying Zhao<sup>1</sup>, Qinxi Liu<sup>1</sup>, Jianpei Xing<sup>1</sup>, Xue Jiang<sup>1\*</sup>, Jijun Zhao<sup>1,2</sup>

<sup>1</sup>Key Laboratory of Materials Modification by Laser, Ion and Electron Beams (Ministry of Education), Dalian University of Technology, Dalian 116024, China

<sup>2</sup>Key Laboratory for Intelligent Nano Materials and Devices of the Ministry of Education, Nanjing University of Aeronautics and Astronautics, Nanjing 210016, China

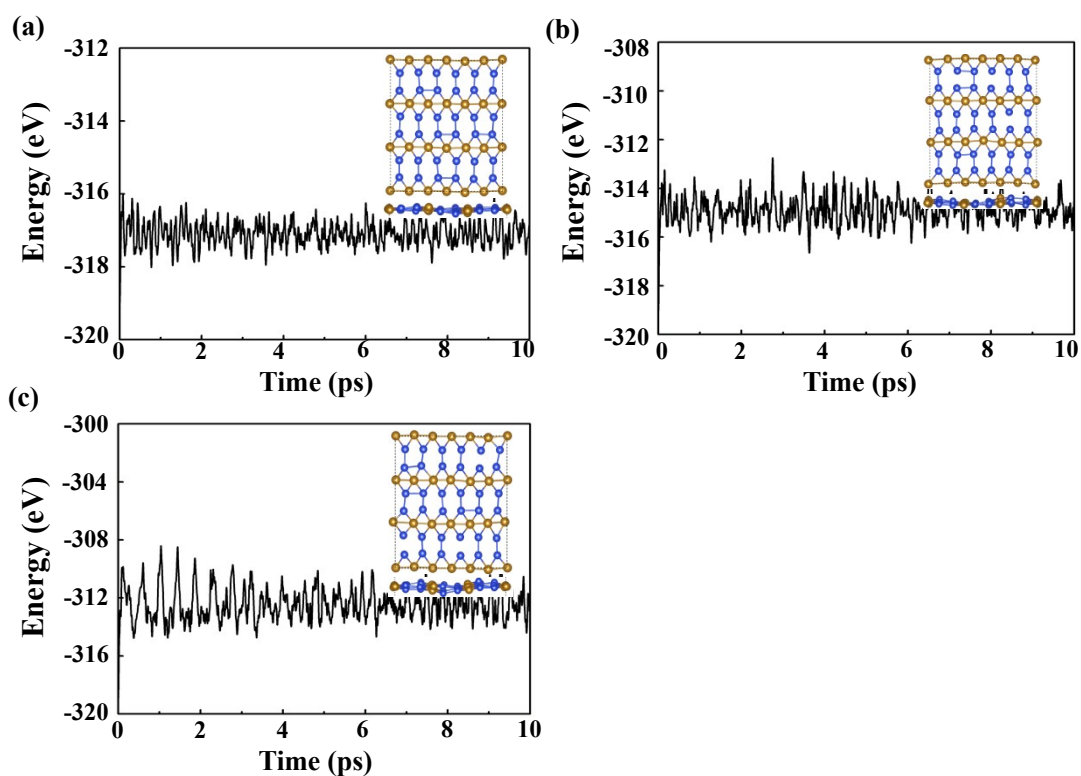

**Fig. S1** Evolution of total energy for FeSi<sub>2</sub> monolayer at (a) 300 K, (b) 600 K, and (c) 900 K based on AIMD simulations. The insets show snapshots of the FeSi<sub>2</sub> monolayer equilibrium structure at different temperatures at the end of the 10-ps AIMD simulation.

\* Corresponding Authors. Email: jiangx@dlut.edu.cn (Xue Jiang)

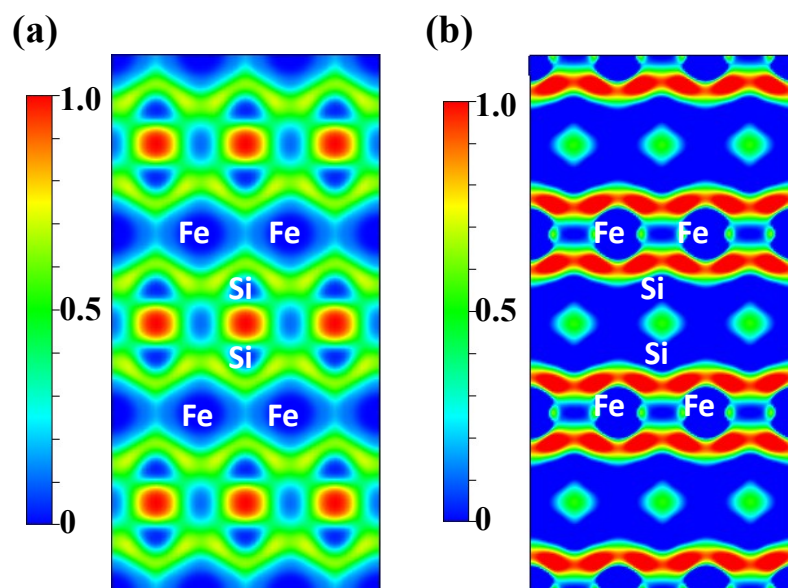

**Fig. S2** (a) ELF maps corresponding to slices of FeSi<sub>2</sub> monolayer perpendicular to the (001) direction with an isosurface of 0.84 au. (b) Differential charge density slices of FeSi<sub>2</sub> monolayer perpendicular to the (001) direction with an isosurface of 0.008 e·Å<sup>-3</sup>. Blue and red colors represent charge accumulation and depletion, respectively.

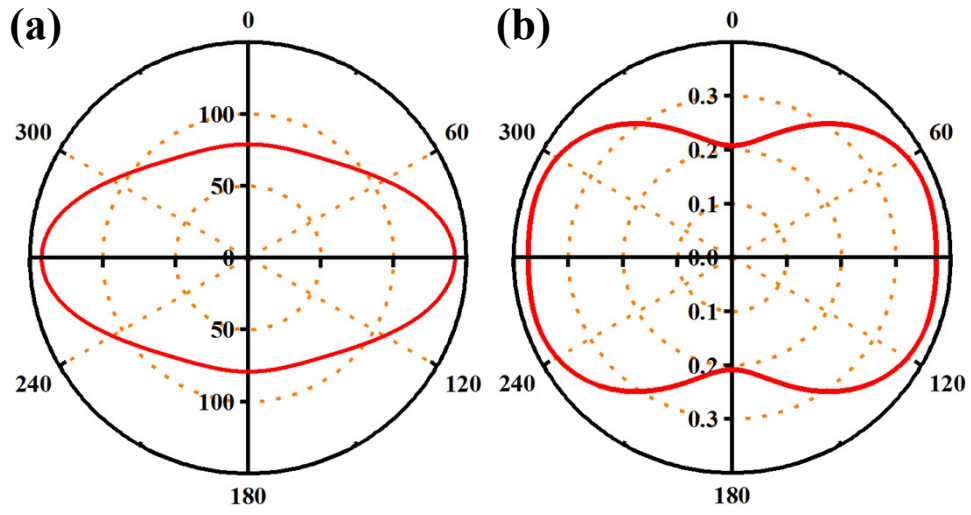

**Fig. S3** Polar diagrams of the (a) Young's modulus and (b) Poisson's ratio of FeSi<sub>2</sub> monolayer.

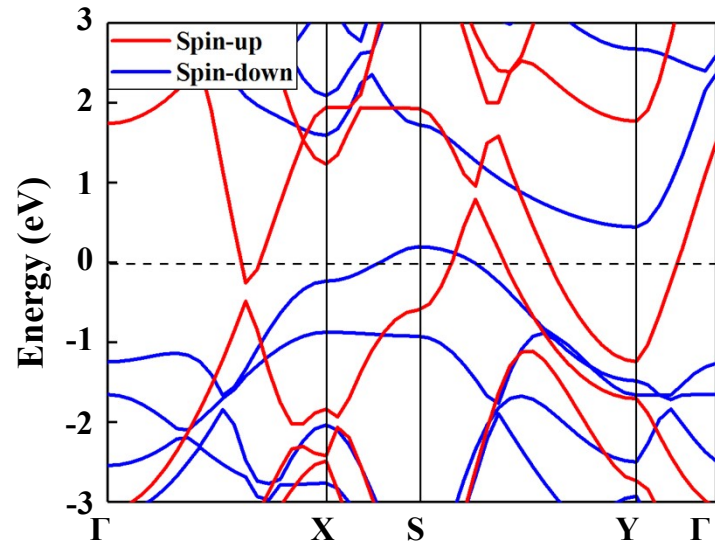

**Fig. S4** Spin-polarized band structures of FeSi<sub>2</sub> monolayer calculated using the HSE06 functional.

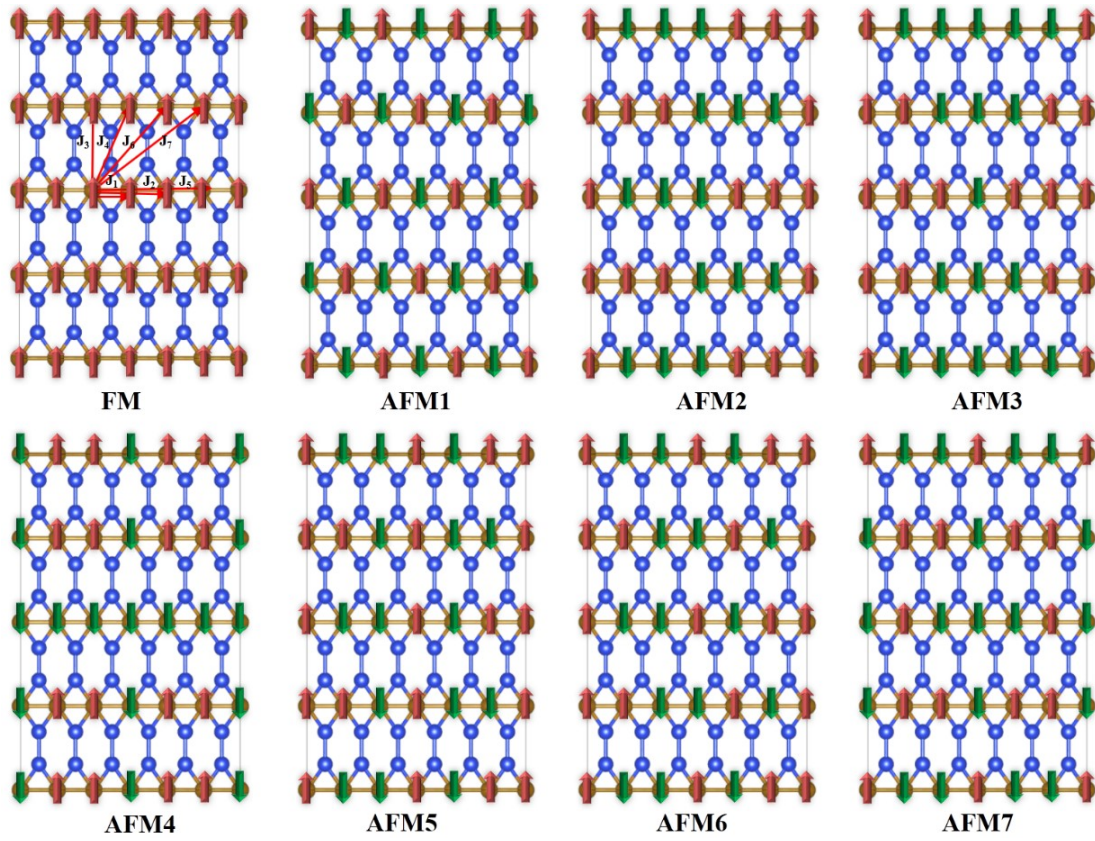

**Fig. S5** Ferromagnetic (FM) state and seven different antiferromagnetic (AFM) states. Red and green indicate spin up and spin down, respectively. The exchange parameters of  $J_i$  ( $i = 1-7$ ) are marked in the FM state.

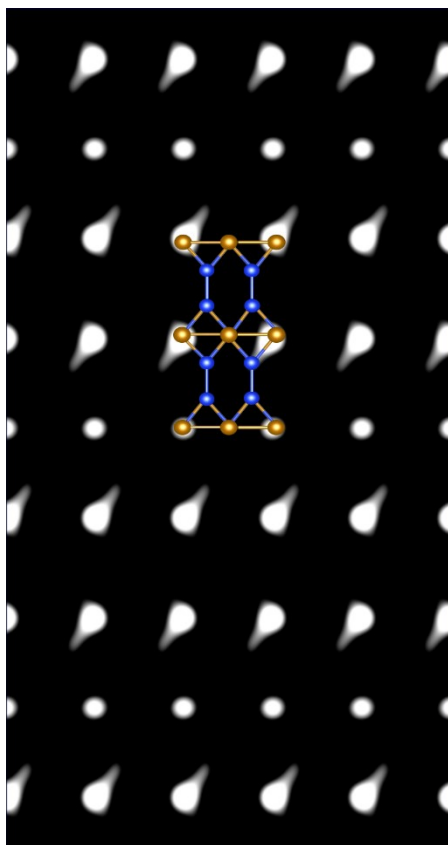

**Fig. S6** Simulated constant-current STM images of FeSi<sub>2</sub> monolayer at a bias voltage of  $-1.32$  eV at  $2$  Å above the Si (110) surface.

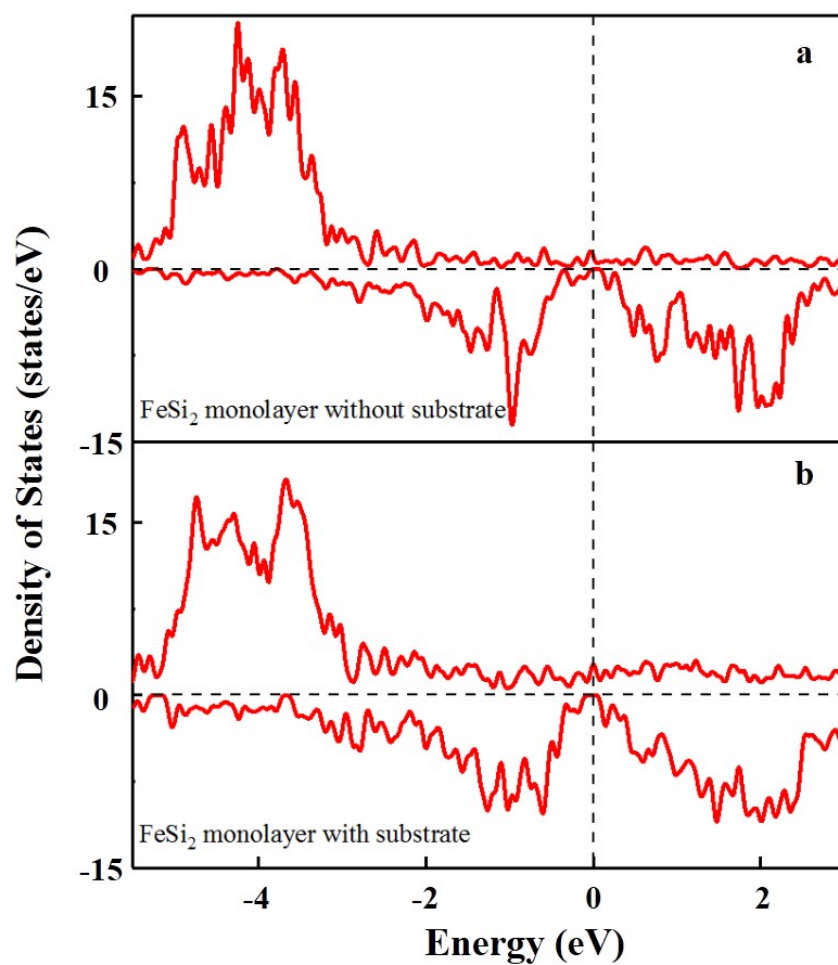

**Fig. S7** DOS diagram of the freestanding FeSi<sub>2</sub> monolayer (a) with and (b) without the Si (110) substrate.

**Table S1.** The energy differences of different AFM states of FeSi<sub>2</sub> monolayer relative to the FM state in a 6×4×1 supercell, with unit is eV.

| System            | FM | AFM1 | AFM2 | AFM3 | AFM4 | AFM5 | AFM6 | AFM7 |
|-------------------|----|------|------|------|------|------|------|------|
| FeSi <sub>2</sub> | 0  | 2.09 | 1.72 | 0.86 | 1.43 | 1.70 | 1.75 | 2.10 |



**Table S2.** The calculated exchange parameters  $J_i$  ( $i = 1-7$ ) of FeSi<sub>2</sub> monolayer at different distances  $d_i$ .

|             | $i = 1$ | $i = 2$ | $i = 3$ | $i = 4$ | $i = 5$ | $i = 6$ | $i = 7$ |
|-------------|---------|---------|---------|---------|---------|---------|---------|
| $d_i$ (Å)   | 2.62    | 5.24    | 5.96    | 6.51    | 7.85    | 7.93    | 9.86    |
| $J_i$ (meV) | 7.5     | -4      | 2.3     | 3       | 0.85    | -1.8    | 1.13    |
